# Supplementary material for: DNA methylation atlas of the mouse brain at single-cell resolution
Source: PubMed Central journal article supplement (PMC8494641; doi:10.1038/s41586-020-03182-8), 2021-10-06
Supplement: 41586_2020_3182_MOESM2_ESM.pdf [file 41586_2020_3182_MOESM2_ESM.pdf]

## Reporting Summary

Nature Research wishes to improve the reproducibility of the work that we publish. This form provides structure for consistency and transparency in reporting. For further information on Nature Research policies, see our [Editorial Policies](#) and the [Editorial Policy Checklist](#).

### Statistics

For all statistical analyses, confirm that the following items are present in the figure legend, table legend, main text, or Methods section.

n/a Confirmed

- The exact sample size ( $n$ ) for each experimental group/condition, given as a discrete number and unit of measurement
- A statement on whether measurements were taken from distinct samples or whether the same sample was measured repeatedly
- The statistical test(s) used AND whether they are one- or two-sided  
*Only common tests should be described solely by name; describe more complex techniques in the Methods section.*
- A description of all covariates tested
- A description of any assumptions or corrections, such as tests of normality and adjustment for multiple comparisons
- A full description of the statistical parameters including central tendency (e.g. means) or other basic estimates (e.g. regression coefficient) AND variation (e.g. standard deviation) or associated estimates of uncertainty (e.g. confidence intervals)
- For null hypothesis testing, the test statistic (e.g.  $F$ ,  $t$ ,  $r$ ) with confidence intervals, effect sizes, degrees of freedom and  $P$  value noted  
*Give  $P$  values as exact values whenever suitable.*
- For Bayesian analysis, information on the choice of priors and Markov chain Monte Carlo settings
- For hierarchical and complex designs, identification of the appropriate level for tests and full reporting of outcomes
- Estimates of effect sizes (e.g. Cohen's  $d$ , Pearson's  $r$ ), indicating how they were calculated

*Our web collection on [statistics for biologists](#) contains articles on many of the points above.*

### Software and code

Policy information about [availability of computer code](#)

**Data collection** BD Influx Software v1.2.0.142 (flow cytometry), Freedom EVOware v2.7 (library preparation), Illumina MiSeq control software v3.1.0.13 and NovaSeq 6000 control software v1.6.0/RTA v3.4.4 (sequencing), Olympus cellSens Dimension 1.8 (image acquisition)

**Data analysis** bedtools 2.27, methylpy 1.4.2, scanpy 1.4.3, juicer tools 1.14.08, REPTILE (<https://github.com/yupenghe/REPTILE.git>), scHiCluster (<https://github.com/zhoujt1994/scHiCluster.git>)  
the mapping pipeline for snmC-seq2 data: <https://cemba-data.readthedocs.io/en/latest/>, including the following packages: bismark 0.20, bowtie2 2.3, cutadapt 1.18, picard 2.18, samtools 1.9, htlib 1.9;  
The ALLCools package for post-mapping analysis and snmC-seq2 related data structure: <https://github.com/lhqing/ALLCools>;  
The jupyter notebooks for specific analysis: [https://github.com/lhqing/mouse\\_brain\\_2020](https://github.com/lhqing/mouse_brain_2020).

For manuscripts utilizing custom algorithms or software that are central to the research but not yet described in published literature, software must be made available to editors and reviewers. We strongly encourage code deposition in a community repository (e.g. GitHub). See the Nature Research [guidelines for submitting code & software](#) for further information.

### Data

Policy information about [availability of data](#)

All manuscripts must include a [data availability statement](#). This statement should provide the following information, where applicable:

- Accession codes, unique identifiers, or web links for publicly available datasets
- A list of figures that have associated raw data
- A description of any restrictions on data availability

Single-cell raw and processed data included in this study were deposited to NCBI GEO/SRA with accession number GSE132489 (each experiment has a separate accession number recorded in GSE132489, see Supplementary Table 12), and to the NeMO archive: <https://assets.nemoarchive.org/dat-vmivr5x>. Single-cell

methylation data can be visualized at the Brain Cell Methylation Viewer: <http://neomorph.salk.edu/omb/home>. Cluster merged methylome profiles can be visualized at [http://neomorph.salk.edu/mouse\\_brain.php](http://neomorph.salk.edu/mouse_brain.php). Other datasets used in the paper include single-nuclei ATAC-Seq data from <http://catlas.org>, mouse embryo forebrain development data from ENCODE portal (<https://www.encodeproject.org/>), the developing hippocampal single-cell RNA-seq data from GSE104323, DNA methylation and chromatin accessibility profiles for mESC from GSM723018, and JASPAR 2020 CORE vertebrates database from <http://meme-suite.org/db/motifs>.

## Field-specific reporting

Please select the one below that is the best fit for your research. If you are not sure, read the appropriate sections before making your selection.

Life sciences  Behavioural & social sciences  Ecological, evolutionary & environmental sciences

For a reference copy of the document with all sections, see [nature.com/documents/nr-reporting-summary-flat.pdf](https://nature.com/documents/nr-reporting-summary-flat.pdf)

## Life sciences study design

All studies must disclose on these points even when the disclosure is negative.

|                 |                                                                                                                                                                                                                                                                                                                                                                                                                                                                                                                                                                                                                                                                                     |
|-----------------|-------------------------------------------------------------------------------------------------------------------------------------------------------------------------------------------------------------------------------------------------------------------------------------------------------------------------------------------------------------------------------------------------------------------------------------------------------------------------------------------------------------------------------------------------------------------------------------------------------------------------------------------------------------------------------------|
| Sample size     | At least 3,072 nuclei (eight 384-well plates) from each dissected region (1,536 nuclei from each replicate). The sample size allowed us to obtain high coverage methylomes for each subtype, and perform confident downstream analyses.                                                                                                                                                                                                                                                                                                                                                                                                                                             |
| Data exclusions | We filtered the cells based on these main mapping metrics: 1) mCCC level < 0.03, 2) overall mCG level > 0.5, 3) overall mCH level < 0.2, 4) total final reads > 500,000, 5) bismark mapping rate > 0.5. Other metrics such as genome coverage, PCR duplicates rate, index ratio were also generated and evaluated during filtering. However, after removing outliers with the main metrics 1-5, few additional outliers can be found. Note the mCCC level is used as the estimation of the upper bound of bisulfite non-conversion rate. The criterion include pre-established ones in Luo. et al 2018, and new ones to exclude additional outliers as justified in the manuscript. |
| Replication     | Each dissected region has at least two replicates, each replicate was pooled from 6-30 animals separately for nuclei preparation and downstream analyses. Data are highly consistent between replicates (Extended Data Fig. 2d-g).                                                                                                                                                                                                                                                                                                                                                                                                                                                  |
| Randomization   | Randomization is not applicable, since the cells collected are random by nature.                                                                                                                                                                                                                                                                                                                                                                                                                                                                                                                                                                                                    |
| Blinding        | Blinding is not applicable, since all data are collected from mice.                                                                                                                                                                                                                                                                                                                                                                                                                                                                                                                                                                                                                 |

## Reporting for specific materials, systems and methods

We require information from authors about some types of materials, experimental systems and methods used in many studies. Here, indicate whether each material, system or method listed is relevant to your study. If you are not sure if a list item applies to your research, read the appropriate section before selecting a response.

### Materials & experimental systems

| n/a                                 | Involved in the study                                           |
|-------------------------------------|-----------------------------------------------------------------|
| <input type="checkbox"/>            | <input checked="" type="checkbox"/> Antibodies                  |
| <input checked="" type="checkbox"/> | <input type="checkbox"/> Eukaryotic cell lines                  |
| <input checked="" type="checkbox"/> | <input type="checkbox"/> Palaeontology and archaeology          |
| <input type="checkbox"/>            | <input checked="" type="checkbox"/> Animals and other organisms |
| <input checked="" type="checkbox"/> | <input type="checkbox"/> Human research participants            |
| <input checked="" type="checkbox"/> | <input type="checkbox"/> Clinical data                          |
| <input checked="" type="checkbox"/> | <input type="checkbox"/> Dual use research of concern           |

### Methods

| n/a                                 | Involved in the study                              |
|-------------------------------------|----------------------------------------------------|
| <input checked="" type="checkbox"/> | <input type="checkbox"/> ChIP-seq                  |
| <input type="checkbox"/>            | <input checked="" type="checkbox"/> Flow cytometry |
| <input checked="" type="checkbox"/> | <input type="checkbox"/> MRI-based neuroimaging    |

## Antibodies

|                 |                                                                                                                                                                                                                                                                                                                                                                                     |
|-----------------|-------------------------------------------------------------------------------------------------------------------------------------------------------------------------------------------------------------------------------------------------------------------------------------------------------------------------------------------------------------------------------------|
| Antibodies used | AlexaFluor488-conjugated anti-NeuN antibody (MAB377X, Millipore)                                                                                                                                                                                                                                                                                                                    |
| Validation      | All antibodies have been previously published for use in immunohistochemistry and flow cytometry experiments. See vendor's page here: <a href="https://www.emdmillipore.com/US/en/product/Anti-NeuN-Antibody-clone-A60-Alexa-Fluor488-conjugated,MM_NF-MAB377X">https://www.emdmillipore.com/US/en/product/Anti-NeuN-Antibody-clone-A60-Alexa-Fluor488-conjugated,MM_NF-MAB377X</a> |

## Animals and other organisms

Policy information about [studies involving animals](#); [ARRIVE guidelines](#) recommended for reporting animal research

|                    |                                                                                                    |
|--------------------|----------------------------------------------------------------------------------------------------|
| Laboratory animals | Adult (P56) C57BL/6J male mice. Housing condition: Temperature: 21-23 C, relative humidity: 61-63% |
| Wild animals       | the study did not involve wild animals                                                             |

Field-collected samples

Ethics oversight

Note that full information on the approval of the study protocol must also be provided in the manuscript.

## Flow Cytometry

### Plots

Confirm that:

- The axis labels state the marker and fluorochrome used (e.g. CD4-FITC).
- The axis scales are clearly visible. Include numbers along axes only for bottom left plot of group (a 'group' is an analysis of identical markers).
- All plots are contour plots with outliers or pseudocolor plots.
- A numerical value for number of cells or percentage (with statistics) is provided.

### Methodology

Sample preparation

Instrument

Software

Cell population abundance

Gating strategy

- Tick this box to confirm that a figure exemplifying the gating strategy is provided in the Supplementary Information.
